# Supplementary material for: Improving the design of long-term monitoring experiments in forests: a new method for the assessment of local soil variability by combining infrared spectroscopy and dendrometric data
Source: Springer Nature journal article supplement (doi:10.1007/s13595-016-0572-3), 2016-08-31
Supplement: MOESM1 [file 13595_2016_572_MOESM1_ESM.doc]

|  |  |  | mean (sd) | | | | | | | | | | | |
| --- | --- | --- | --- | --- | --- | --- | --- | --- | --- | --- | --- | --- | --- | --- |
| site | species | treatment | pH_water | CEC (cmol+/kg) | Al (g/100 g) | Ca (g/100 g) | Fe (g/100 g) | K (g/100 g) | Mg (g/100 g) | Mn (mg/kg) | Na (g/100 g) | P2O5 (g/100 g) | N (g/100 g) | C (g/100 g) |
| ban | beech | 4 | 4.68 (0.03) | 4.35 (0.25) | 4.94 (0.24) | 0.05 (0.01) | 2.22 (0.07) | 2.42 (0.01) | 0.29 (0.01) | 652.25 (103.36) | 0.23 (0) | 0.07 (0.01) | 0.14 (0.03) | 2.49 (0.51) |
| ban | beech | 1 | 4.64 (0.03) | 4.47 (0.49) | 5 (0.19) | 0.05 (0.01) | 2.23 (0.06) | 2.43 (0.03) | 0.29 (0) | 565.25 (62.13) | 0.24 (0) | 0.07 (0) | 0.15 (0.03) | 2.61 (0.54) |
| ban | beech | 3 | 4.69 (0.02) | 3.92 (0.58) | 4.97 (0.24) | 0.04 (0.01) | 2.21 (0.05) | 2.51 (0.05) | 0.29 (0.01) | 733.75 (89.85) | 0.2 (0) | 0.07 (0) | 0.16 (0.03) | 2.82 (0.59) |
| ban | beech | 2 | 4.69 (0.01) | 4.42 (0.65) | 5.21 (0.45) | 0.05 (0.02) | 2.42 (0.16) | 2.53 (0.07) | 0.32 (0.01) | 782 (147.47) | 0.23 (0) | 0.08 (0) | 0.17 (0.04) | 2.97 (0.57) |
| comphet | beech | 2 | 5.07 (0.03) | 3.36 (0.84) | 1.75 (0.07) | 0.15 (0.03) | 0.85 (0.02) | 0.73 (0.02) | 0.1 (0) | 280.25 (28.69) | 0.29 (0.01) | 0.04 (0.01) | 0.11 (0.05) | 1.64 (0.67) |
| comphet | beech | 1 | 4.73 (0.05) | 2.5 (0.6) | 1.75 (0.07) | 0.13 (0.03) | 0.85 (0.01) | 0.74 (0.02) | 0.1 (0) | 238.75 (44.86) | 0.3 (0.01) | 0.04 (0.01) | 0.11 (0.05) | 1.74 (0.8) |
| comphet | beech | 3 | 4.79 (0.09) | 2.75 (0.53) | 1.7 (0.09) | 0.13 (0.02) | 0.84 (0.03) | 0.72 (0.03) | 0.09 (0) | 255 (45.01) | 0.28 (0.01) | 0.04 (0.01) | 0.12 (0.06) | 1.8 (0.9) |
| comphet | beech | 4 | 4.89 (0.09) | 3.2 (0.17) | 1.88 (0.11) | 0.16 (0.02) | 0.97 (0.04) | 0.75 (0.03) | 0.11 (0) | 292.75 (44.84) | 0.29 (0.01) | 0.05 (0.01) | 0.13 (0.06) | 1.83 (0.78) |
| dar | beech | 3 | 4.55 (0.01) | 4.12 (0.38) | 4.72 (0.19) | 0.05 (0.02) | 1.72 (0.07) | 2.54 (0.03) | 0.24 (0.01) | 303.25 (55.99) | 0.2 (0) | 0.07 (0.01) | 0.14 (0.04) | 2.46 (0.34) |
| dar | beech | 2 | 4.54 (0.03) | 4.38 (0.44) | 4.73 (0.22) | 0.05 (0.01) | 1.76 (0.01) | 2.52 (0.08) | 0.25 (0) | 288 (40.38) | 0.2 (0) | 0.07 (0.01) | 0.14 (0.04) | 2.69 (0.36) |
| dar | beech | 1 | 4.51 (0.03) | 4.51 (0.37) | 7.05 (2.89) | 0.06 (0.01) | 2.6 (1.11) | 3.8 (1.48) | 0.37 (0.14) | 398 (101.59) | 0.27 (0.11) | 0.1 (0.03) | 0.15 (0.05) | 2.83 (0.57) |
| dar | beech | 4 | 4.54 (0.03) | 4.38 (0.35) | 4.88 (0.41) | 0.13 (0.2) | 1.7 (0.11) | 2.75 (0.03) | 0.26 (0.01) | 337.5 (87.43) | 0.17 (0.01) | 0.07 (0.01) | 0.15 (0.05) | 2.88 (0.66) |
| gail | beech | 3 | 4.37 (0.18) | 4.69 (1.01) | 3.99 (0.19) | 0.16 (0.02) | 1.96 (0.08) | 1.39 (0.04) | 0.24 (0.01) | 695.5 (53.68) | 0.56 (0.02) | 0.1 (0.02) | 0.21 (0.1) | 2.93 (1.66) |
| gail | beech | 2 | 4.39 (0.18) | 4.75 (1.19) | 4.01 (0.09) | 0.17 (0.02) | 1.96 (0.04) | 1.41 (0.01) | 0.25 (0.01) | 639.5 (52.62) | 0.6 (0.01) | 0.09 (0.03) | 0.21 (0.1) | 2.96 (1.45) |
| gail | beech | 4 | 4.35 (0.2) | 4.99 (1.28) | 3.98 (0.22) | 0.17 (0.02) | 1.91 (0.1) | 1.41 (0.05) | 0.25 (0.02) | 732 (144) | 0.6 (0.04) | 0.1 (0.02) | 0.23 (0.12) | 3.21 (1.94) |
| gail | beech | 1 | 4.38 (0.21) | 4.56 (1.22) | 3.96 (0.21) | 0.17 (0.03) | 1.91 (0.09) | 1.41 (0.06) | 0.24 (0.02) | 701.25 (124.71) | 0.58 (0.03) | 0.11 (0.03) | 0.25 (0.12) | 3.37 (1.88) |
| verr | beech | 2 | 4.41 (0.1) | 4.4 (0.35) | 3.46 (0.24) | 0.09 (0.01) | 2.42 (0.14) | 0.97 (0.03) | 0.23 (0.01) | 734.75 (96.5) | 0.21 (0.01) | 0.09 (0.01) | 0.19 (0.08) | 3.56 (1.41) |
| verr | beech | 4 | 4.47 (0.1) | 5.23 (0.66) | 3.76 (0.23) | 0.08 (0.02) | 2.9 (0.13) | 0.9 (0.04) | 0.25 (0.01) | 950.75 (157.72) | 0.23 (0.01) | 0.1 (0.01) | 0.21 (0.07) | 3.68 (1.33) |
| verr | beech | 1 | 4.49 (0.07) | 4.94 (0.75) | 3.88 (0.14) | 0.12 (0.04) | 2.7 (0.18) | 1.01 (0.02) | 0.27 (0.01) | 936.5 (225.97) | 0.25 (0.01) | 0.1 (0.02) | 0.21 (0.09) | 3.69 (1.58) |
| verr | beech | 3 | 4.55 (0.13) | 4.91 (1.01) | 3.69 (0.2) | 0.09 (0.02) | 2.72 (0.14) | 0.96 (0.03) | 0.25 (0.01) | 1067.25 (127.74) | 0.23 (0.01) | 0.1 (0.02) | 0.21 (0.08) | 4.11 (1.51) |
| champ | oak | 4 | 4.96 (0.06) | 9.61 (0.92) | 7.45 (0.49) | 0.09 (0.04) | 4.26 (0.29) | 1.69 (0.03) | 0.53 (0.02) | 1467.5 (215.02) | 0.52 (0.02) | 0.11 (0.02) | 0.21 (0.06) | 2.76 (0.83) |
| champ | oak | 2 | 5.04 (0.05) | 8.66 (1.17) | 6.98 (0.4) | 0.1 (0.05) | 4.51 (0.05) | 1.66 (0.03) | 0.47 (0.02) | 1727.5 (239.65) | 0.59 (0.02) | 0.11 (0.01) | 0.22 (0.07) | 2.82 (1.04) |
| champ | oak | 3 | 5.01 (0.06) | 9.64 (1.06) | 7.4 (0.63) | 0.11 (0.04) | 4.71 (0.05) | 1.68 (0.04) | 0.52 (0.02) | 1822.5 (176.16) | 0.52 (0.01) | 0.12 (0.02) | 0.22 (0.07) | 2.94 (1.02) |
| champ | oak | 1 | 5.09 (0.11) | 9.39 (1.14) | 7.7 (0.86) | 0.11 (0.04) | 4.77 (0.2) | 1.75 (0.08) | 0.54 (0.03) | 2055 (147.99) | 0.55 (0.04) | 0.13 (0.01) | 0.22 (0.07) | 2.95 (0.91) |
| compche | oak | 3 | 5.09 (0.08) | 2.61 (0.91) | 1.75 (0.07) | 0.15 (0.02) | 0.85 (0.03) | 0.81 (0.03) | 0.1 (0) | 218.5 (19.43) | 0.29 (0.02) | 0.04 (0.01) | 0.11 (0.05) | 1.56 (0.62) |
| compche | oak | 2 | 5.32 (0.14) | 3.24 (0.93) | 1.7 (0.08) | 0.16 (0.02) | 0.89 (0.05) | 0.75 (0.01) | 0.1 (0) | 155.75 (19.16) | 0.25 (0) | 0.03 (0.01) | 0.12 (0.04) | 1.76 (0.53) |
| compche | oak | 4 | 5.17 (0.13) | 2.74 (1) | 1.72 (0.1) | 0.16 (0.03) | 0.84 (0.06) | 0.8 (0.03) | 0.1 (0.01) | 188.5 (21.39) | 0.28 (0.01) | 0.04 (0.01) | 0.12 (0.05) | 1.81 (0.78) |
| compche | oak | 1 | 4.99 (0.03) | 2.44 (0.6) | 1.64 (0.03) | 0.13 (0.03) | 0.82 (0.03) | 0.75 (0.01) | 0.09 (0) | 155.25 (29.51) | 0.27 (0.01) | 0.03 (0.01) | 0.12 (0.05) | 1.82 (0.65) |
| font | oak | 1 | 4.67 (0.25) | 1.46 (0.54) | 0.99 (0.06) | 0.06 (0.02) | 0.32 (0.03) | 0.64 (0.03) | 0.03 (0) | 192.9 (87.25) | 0.14 (0.01) | 0.02 (0.01) | 0.11 (0.06) | 1.89 (1.16) |
| font | oak | 3 | 4.47 (0.22) | 1.31 (0.53) | 0.98 (0.06) | 0.06 (0.02) | 0.33 (0.03) | 0.63 (0.02) | 0.03 (0) | 187.28 (94) | 0.15 (0.01) | 0.02 (0.01) | 0.12 (0.07) | 2.2 (1.26) |
| font | oak | 2 | 4.49 (0.23) | 1.42 (0.51) | 0.97 (0.06) | 0.07 (0.03) | 0.33 (0.04) | 0.62 (0.02) | 0.03 (0) | 180.95 (75.6) | 0.15 (0.01) | 0.02 (0.01) | 0.13 (0.08) | 2.32 (1.45) |
| font | oak | 4 | 4.54 (0.19) | 1.46 (0.53) | 1.29 (0.4) | 0.08 (0.01) | 0.5 (0.21) | 0.71 (0.12) | 0.05 (0.03) | 206.03 (123.19) | 0.19 (0.06) | 0.03 (0.01) | 0.13 (0.09) | 2.37 (1.48) |
| gro | oak | 2 | 4.69 (0.13) | 1.67 (0.63) | 2.72 (0.18) | 0.04 (0.03) | 0.66 (0.01) | 1.19 (0.08) | 0.08 (0) | 744.25 (122.48) | 0.15 (0.01) | 0.05 (0.01) | 0.12 (0.07) | 2.17 (1.28) |
| gro | oak | 3 | 4.88 (0.06) | 2.91 (0.46) | 3.08 (0.15) | 0.05 (0.02) | 0.88 (0.04) | 1.22 (0.07) | 0.11 (0) | 839.75 (93.33) | 0.16 (0.01) | 0.05 (0.01) | 0.13 (0.07) | 2.23 (1.22) |
| gro | oak | 1 | 4.73 (0.12) | 2.27 (0.46) | 2.67 (0.11) | 0.04 (0.03) | 0.72 (0.04) | 1.18 (0.05) | 0.08 (0) | 671.5 (94.71) | 0.13 (0.01) | 0.05 (0.01) | 0.13 (0.07) | 2.29 (1.21) |
| gro | oak | 4 | 4.77 (0.08) | 2.74 (0.69) | 2.95 (0.2) | 0.07 (0.01) | 0.77 (0.04) | 1.12 (0.06) | 0.09 (0) | 740.75 (106.5) | 0.13 (0) | 0.05 (0.01) | 0.14 (0.08) | 2.41 (1.56) |
| reich | oak | 3 | 4.89 (0.04) | 3.8 (0.83) | 3.86 (0.11) | 0.21 (0.02) | 1.65 (0.05) | 1.45 (0.03) | 0.25 (0.01) | 827.25 (100.2) | 0.75 (0.03) | 0.06 (0.01) | 0.11 (0.04) | 1.78 (0.81) |
| reich | oak | 4 | 4.79 (0.01) | 3.21 (0.81) | 3.71 (0.09) | 0.21 (0.05) | 1.55 (0.04) | 1.47 (0.04) | 0.23 (0.01) | 740.25 (88.49) | 0.74 (0.02) | 0.06 (0.01) | 0.11 (0.04) | 1.8 (0.67) |
| reich | oak | 2 | 4.86 (0.03) | 3.21 (0.77) | 3.65 (0.1) | 0.2 (0.03) | 1.47 (0.02) | 1.44 (0.05) | 0.22 (0) | 637.25 (62.61) | 0.72 (0.02) | 0.06 (0.01) | 0.11 (0.05) | 1.92 (0.82) |
| reich | oak | 1 | 4.83 (0.05) | 3.41 (0.7) | 3.86 (0.25) | 0.21 (0.04) | 1.55 (0.04) | 1.49 (0.1) | 0.24 (0.01) | 693.25 (68.51) | 0.77 (0.04) | 0.06 (0.02) | 0.12 (0.06) | 2.16 (1.22) |
| tron | oak | 1 | 5.1 (0.06) | 1.48 (0.52) | 2.86 (0.16) | 0.04 (0.03) | 0.77 (0.01) | 2.03 (0.2) | 0.08 (0) | 1855 (219.39) | 0.16 (0.01) | 0.06 (0.01) | 0.09 (0.02) | 1.51 (0.83) |
| tron | oak | 4 | 5.11 (0.01) | 1.63 (0.41) | 3.17 (0.12) | 0.04 (0.02) | 0.88 (0.02) | 2.29 (0.13) | 0.09 (0) | 1835 (185.83) | 0.19 (0.01) | 0.07 (0.01) | 0.09 (0.03) | 1.26 (0.72) |
| tron | oak | 3 | 5.1 (0.04) | 1.47 (0.54) | 2.85 (0.15) | 0.04 (0.03) | 0.75 (0.02) | 2.08 (0.12) | 0.08 (0) | 1675 (173.21) | 0.16 (0.01) | 0.06 (0.01) | 0.09 (0.04) | 1.57 (0.93) |
| tron | oak | 2 | 5.15 (0.04) | 1.7 (0.52) | 3.28 (0.16) | 0.06 (0.06) | 0.87 (0.02) | 2.41 (0.14) | 0.09 (0) | 1940 (152.75) | 0.2 (0.01) | 0.07 (0.01) | 0.09 (0.04) | 1.45 (0.86) |

**Table S1** Soil chemical characteristics at the 11 experimental sites. The average values have been calculated for the three soil depths for each treatment plot. Standard deviations are given in parentheses.
